# Supplementary material for: Characterization of metastatic tumor antigen 1 and its interaction with hepatitis B virus X protein in NF-κB signaling and tumor progression in a woodchuck hepatocellular carcinoma model
Source: PubMed Central journal article supplement (PMC5216933; doi:10.18632/oncotarget.9986), 2016-06-13
Supplement: oncotarget-07-47173-s001.pdf [file oncotarget-07-47173-s001.pdf]

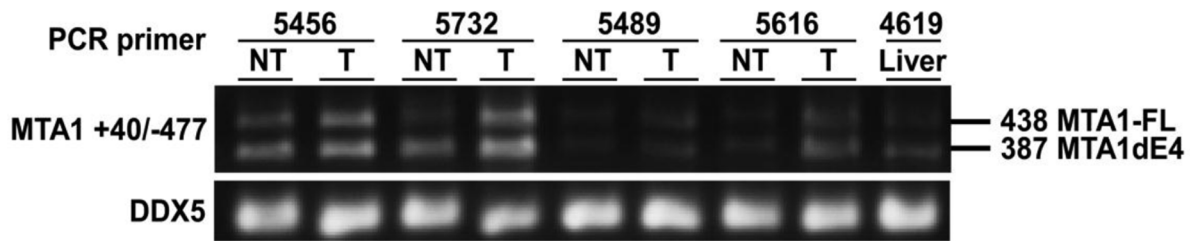

**Supplementary Figure S2: Presence of wk-MTA1 spliced variant wk-MTA1dE4 was examined in woodchuck autopsy samples.** The expression levels of wk-MTA1-FL and wk-MTA1dE4 were determined using conventional RT-PCR with primer pairs covering the spliced region of wk-MTA1dE4 (MTA1, +40 and MTA1, -477) in liver tissues from one WHV-resolved woodchuck (designated as 4619 liver) and 4 woodchucks with paired tumor and nontumor tissues. DDX5 was used as the internal control.

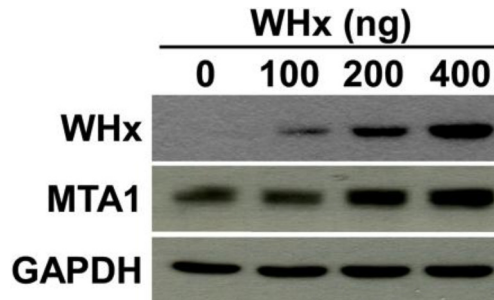

**Supplementary Figure S3: WHx dose-dependently upregulates wk-MTA1 expression in WCH17 cells.** Western blotting of WHx and wk-MTA1 in WCH17 cells transfected with either control vector (0) or WHx-expressing plasmids at different concentrations (100, 200, and 400 ng/transfection). GAPDH was used as the loading control.

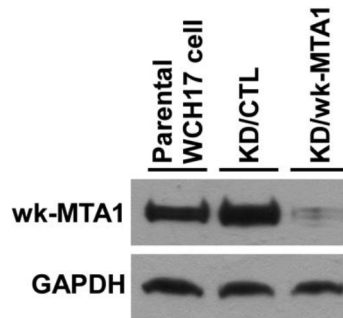

**Supplementary Figure S4: Wk-MTA1 protein was significantly decreased in KD/wk-MTA1 cells but not in KD/CTL cells.** WCH17 cells (designated as parental cells) were transfected with wk-MTA1-targeting shRNA (sh-MTA1-1) and control shRNA (sh-m-MTA1). Puromycin-resistant cells stably expressing shMTA1-1 and sh-mMTA1 were designated as KD/wk-MTA1 and KD/CTL (control designated as CTL). Cells were lysed, and the expression level of wk-MTA1 was examined using Western blotting.

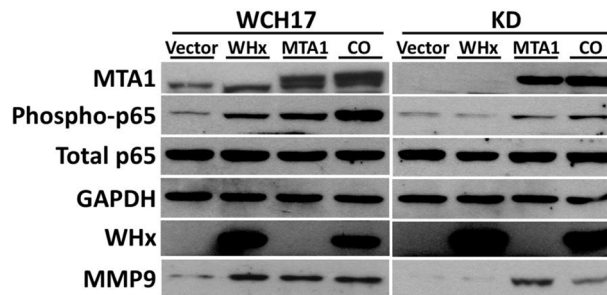

**Supplementary Figure S5: Wk-MTA1 is essential for WHx-mediated NF-κB signaling.** The expression levels of wk-MTA1, phosphorylated p65, total p65, WHx, and MMP9 were assessed in WCH17 and KD/wk-MTA1 WCH17 (designated as KD) cells by western blot. GAPDH served as a loading control. CO: cells cotransfected with WHx and wk-MTA1-expressing plasmids.

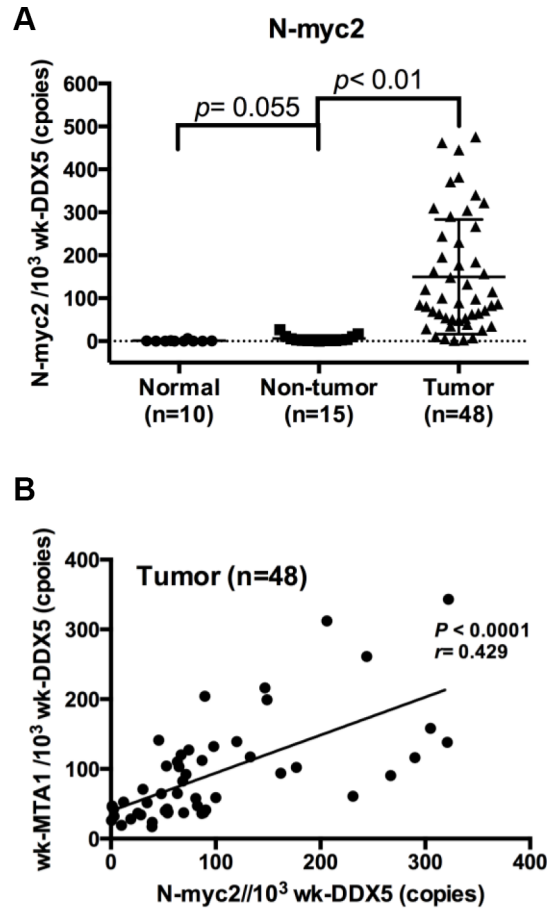

**Supplementary Figure S6: N-myc2 was upregulated in woodchuck HCC tissues and positively correlated with the levels of wk-MTA1.** (A) The expression of N-myc2 was detected using qRT-PCR with primer pairs (N-myc2, +780 and N-myc2, -1368) in normal and nontumor and tumor tissues. (B) A positive correlation was observed between wk-MTA1 expression and N-myc2 expression in woodchuck tumor liver samples ( $n = 48$ ). The statistical significance and correlation coefficient  $r$  was determined using Pearson correlation. The expression of each target gene was normalized to  $10^3$  wk-DDX5 mRNA. The results are presented as mean  $\pm$  SD.

*Animal model*

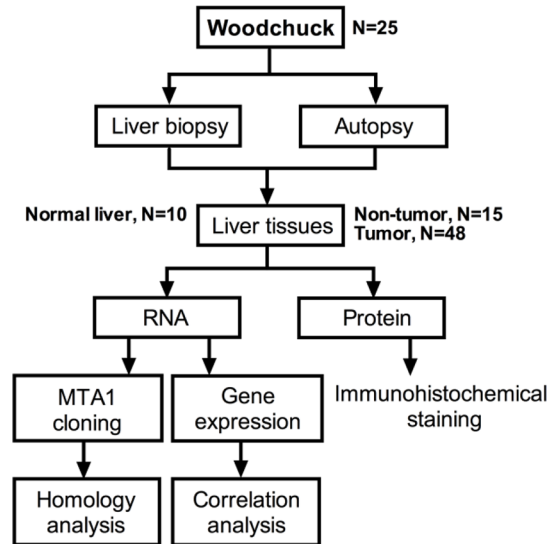

*in vitro*

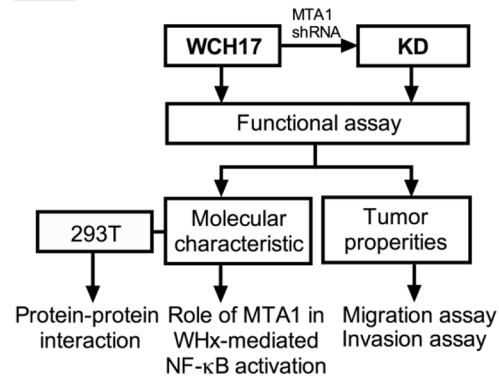

**Supplementary Figure S7: Flowchart of the experimental approaches used in this study.** Liver biopsies from 10 WHV-resolved woodchucks were designated as normal liver tissues. All paired tumor and nontumor tissues were obtained from 15 woodchucks. Four of the woodchucks had a single tumor, whereas the remaining woodchucks had multiple tumors.

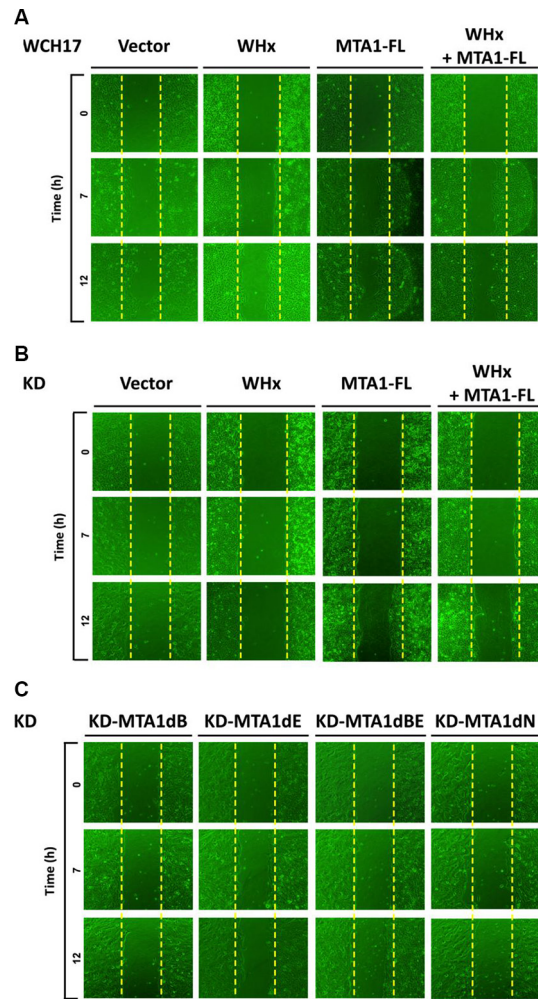

**Supplementary Figure S8: Wound healing assay was employed to determine the migration ability of WCH17 and MTA1-knocked down cells.** (A) WCH17 and (B) KD cells were transfected with an empty vector, WHx, and wk-MTA1 expression plasmids. (C) KD cells were transfected with wk-MTA1 expressing plasmids with different domain deletions. Cells were monitored and photographed at 7 and 12 hours after incubation. Original magnification:  $\times 200$ .

**A WCH17**

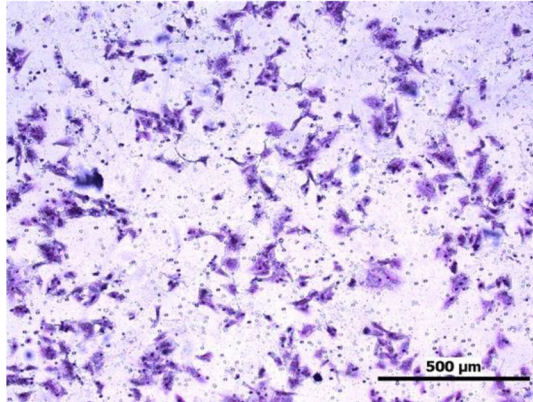

**B KD**

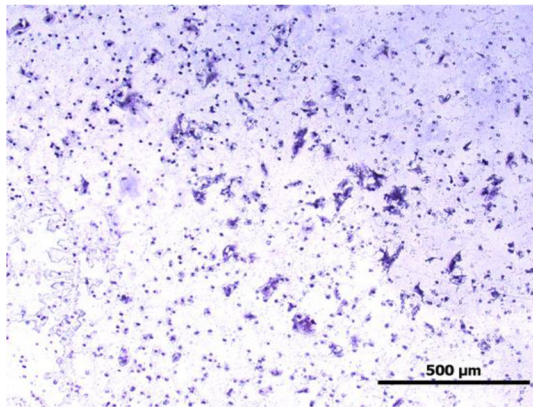

**Supplementary Figure S9: Knockdown of wk-MTA1 expression reduces cell invasion ability.** The invasiveness of WCH17 and KD cells was determined using the transwell assay. The invaded (A) WCH17 and (B) KD cells were photographed at 22 hours after plating. Original magnification:  $\times 400$ .

**Supplementary Table S1: Primers and probes used for cloning, Northern blotting, RT-PCR, and qRT-PCR analysis**

| Primer                    |    | Priming site <sup>2</sup> | Oligonucleotide sequence (5'→3')                           |
|---------------------------|----|---------------------------|------------------------------------------------------------|
| 3'RACE Outer <sup>1</sup> | Rv |                           | GCG AGC ACA GAA TTA ATA CGA CT                             |
| 5'RACE Outer <sup>1</sup> | Fw |                           | GCT GAT GGC GAT GAA TGA ACA CTG                            |
| 5'RACE Inner <sup>1</sup> | Fw |                           | CGC GGA TCC GAA CAC TGC GTT TGC TGG CTT TGA TGA AA         |
| MTA1-F                    | Fw | 1320→1346                 | GCC RGG ACC AAA CCG CAR TAA CAT GAG <sup>3</sup>           |
| MTA1-R                    | Rv | 1727→1710                 | GGA GCC ATT GTT GAT GAC C                                  |
| MTA1-F2                   | Fw | -15→3                     | GCC GCC GGC CCG GAC <u>ATG</u>                             |
| MTA1-FC                   | Fw | 1→12                      | <b>GGA ATT CCG ACA</b> <u>TGG</u> CCG CCA AC               |
| MTA1-RC                   | Rv | 2148→2135                 | GCT <b>CTA GAG</b> <u>CCT</u> AGT CCT CRA TGA <sup>3</sup> |
| MTA1 +392                 | Fw | 392→414                   | TCA ACG AGA CCG AGT CGC TCA AG                             |
| MTA1 -910                 | Rv | 910→888                   | CAT ATT TTT CCA GGG CTT CCT C                              |
| 18 s rRNA F               | Fw |                           | CCC TGT AAT TGG AAT GAG TCC A                              |
| 18 s rRNA R               | Rv |                           | ATC TGA TCG TCT TCG AAC CTC C                              |
| MTA1 +392                 | Fw | 392→414                   | TCA ACG AGA CCG AGT CGC TCA AG                             |
| MTA1 -910                 | Rv | 910→888                   | CAT ATT TTT CCA GGG CTT CCT C                              |
| 18 s rRNA F               | Fw |                           | CCC TGT AAT TGG AAT GAG TCC A                              |
| 18 s rRNA R               | Rv |                           | ATC TGA TCG TCT TCG AAC CTC C                              |
| MTA1-FQ                   | Fw | 1177→1194                 | TGC GAG AGC TGT TAC ACC                                    |
| MTA1-RQ                   | Rv | 1244→1227                 | RCG ACA CTG CAT GTT AGG <sup>3</sup>                       |
| DDX5-F                    | Fw |                           | CTT GTC CTT GAT GAA GCA GA                                 |
| DDX5-R                    | Rv |                           | AGT CGC ACT CCA CAT TAG                                    |
| MTA1-FL-F                 | Fw | 194→212                   | TGT CAG TCT GCT ATA AGG C                                  |
| MTA1dE4-F                 | Fw | 178→190,<br>242→246       | GAC AAG CAY GCA AGG GAA <sup>3</sup>                       |
| MTA1 -421                 | Rv | 421→405                   | GGT AGG ACT TGA GCG AC                                     |
| MTA1 +40                  | Fw | 40→62                     | TTC GAG AAC TCC TCC AGC AAC CC                             |
| MTA1 -477                 | Rv | 477→455                   | GGT CTT CTG CTG TGG GTC GTA GA                             |
| N-myc2 +780               | Fw |                           | GTT GAC GAG GAG GAA GAT GA                                 |
| N-myc2 -948               | Rv |                           | GCA TAG TTG TGC TGC TGG TA                                 |

Fw: forward primer; Rv: reverse primer; EcoRI and XbaI endonuclease digestion sites are shown in bold. Start and stop codons are indicated by underlined and double underlined characters, respectively.

1: The primer was obtained from the FirstChoice RLM-RACE kit.

2: The position of the primers relative to our published *Marmota monax* MTA1 cDNA sequence (Accession number: JX891465.1).

3: Degenerate primer (symbol R = A or G nucleotide, symbol Y = C or T nucleotide).

**Supplementary Table S2: Details of PCR amplification programs for molecular cloning**

| Resulted region                          | Strategy                     | PCR program                     |                                |                            |              |
|------------------------------------------|------------------------------|---------------------------------|--------------------------------|----------------------------|--------------|
|                                          |                              | Step                            | Temperature (°C)               | Time                       | No. of Cycle |
| 3' RLM<br>-RACE<br><br>1320<br>↓<br>2629 | RACE-PCR                     | Initial Denature                | 95                             | 3 min                      | 1            |
|                                          |                              | Denature Annealing<br>Extension | 95<br>57<br>72                 | 30 sec<br>30 sec<br>30 sec | 35           |
|                                          |                              | Final extension                 | 72                             | 7 min                      | 1            |
|                                          |                              |                                 |                                |                            |              |
| 5' RLM<br>-RACE<br><br>1072<br>↓<br>1727 | Slowdown<br>PCR <sup>+</sup> | Initial Denature                | 98                             | 3 min                      | 1            |
|                                          |                              | Denature Annealing<br>Extension | 98<br>66→52 <sup>#</sup><br>68 | 30 sec<br>30 sec<br>30 sec | 45           |
|                                          |                              | Denature Annealing<br>Extension | 98<br>57<br>68                 | 30 sec<br>30 sec<br>30 sec | 15*          |
|                                          |                              | Final extension                 | 68                             | 7 min                      | 1            |
| wk-MTA1                                  | 1<br>↓<br>1244               | Slowdown<br>PCR <sup>+</sup>    | As same as 5' RLM-RACE         |                            |              |

All cycles were run in a generally reduced ramp rate at 2.5°C and especially a small cooling rate for reaching annealing temperature at 1.5°C.

<sup>#</sup>The annealing temperature is gradually decreased during the cycling process.

<sup>+</sup>A well-established PCR method, which allows the successful PCR-amplification of extremely GC-rich (> 83%) DNA targets.

\*Additional cycles.
